# Supplementary material
Source: HighWire-hosted journal article supplement (https://bmjopen.bmj.com/content/9/6/e026075)
Supplement: inline-supplementary-material-3 [file inline-supplementary-material-3.pdf]

Online supplementary file 3. Characteristics of the studies analysed in this review

| Author, year, country           | No. of participants | Study type       | Intervention (a, Timing of commencement; b, Contents; c, Duration; d, Frequency)                                                                                                                           | Control         | Outcomes                                                                                                                           | Notes                                       |
|---------------------------------|---------------------|------------------|------------------------------------------------------------------------------------------------------------------------------------------------------------------------------------------------------------|-----------------|------------------------------------------------------------------------------------------------------------------------------------|---------------------------------------------|
| Jones et al., 2003, UK          | 126                 | Multi-centre RCT | a: in-hospital<br>b: routine follow-up plus rehabilitation package consisting of 93 pages of text<br>c: 6 weeks<br>d: every day*                                                                           | No intervention | HRQoL, Mortality, Depression symptoms, PTSD-related symptoms                                                                       | ICU rehabilitation before randomisation*    |
| Cuthbertson et al., 2009, UK    | 286                 | Multi-centre RCT | a: in-hospital<br>b: manual based, self-directed, physical rehabilitation program developed by physiotherapists and introduced by a study nurse<br>c: continued for 3 months after discharge<br>d: unknown | No intervention | HRQoL, Mortality, Quality-adjusted life years, Incidence and severity of PTSD, Anxiety and depression symptoms, Cost effectiveness | ICU rehabilitation before randomisation*    |
| Elliott et al., 2011, Australia | 195                 | Multi-centre RCT | a: after hospital discharge<br>b: home-based physical rehabilitation program focused on strength training and walking<br>c: 8 weeks<br>d: 5 times/week                                                     | No intervention | HRQoL, Mortality, Physical function                                                                                                | No ICU rehabilitation before randomisation* |

|                            |     |                         |                                                                                                                                                                 |                 |                                                                                                                                                             |                                          |
|----------------------------|-----|-------------------------|-----------------------------------------------------------------------------------------------------------------------------------------------------------------|-----------------|-------------------------------------------------------------------------------------------------------------------------------------------------------------|------------------------------------------|
| Salisbury et al., 2010, UK | 16  | Single-centre pilot RCT | a: in-hospital<br>b: enhanced physiotherapy and dietetic rehabilitation package<br>c: unknown<br>d: unknown                                                     | Standard care   | Physical outcomes, Nutritional outcome, Breathlessness on the Visual analogue scale scores for breathlessness, fatigue, joint stiffness, pain, and appetite |                                          |
| Batterham et al., 2014, UK | 59  | Multi-centre RCT        | a: after hospital discharge<br>b: hospital-based, physiotherapist-led, supervised exercise<br>c: 8 weeks<br>d: 2 times/week                                     | No intervention | HRQoL, Oxygen uptake, Mood disorder                                                                                                                         |                                          |
| Connolly et al., 2015, UK  | 20  | Two-centre pilot RCT    | a: after hospital discharge<br>b: exercise-base rehabilitation session of 40 minutes<br>c: 8 weeks<br>d: 3 times/week (2 times supervised, 1 time unsupervised) | No intervention | HRQoL, ADL, Mortality, Physical function, Muscle strength, Adverse events, Anxiety and depression symptoms                                                  | ICU rehabilitation before randomisation* |
| Walsh et al., 2015, UK     | 240 | Two-centre RCT          | a: in-hospital<br>b: mobilization exercise and relevant dietetic, occupational, and speech/language therapy<br>c: from ICU discharge until hospital             | Standard care   | Mobility index, HRQoL, Anxiety and depression symptoms, Self-reported symptom scores (using visual analogue scales)                                         | ICU rehabilitation before randomisation  |

|                                   |    |                       |                                                                                                                                                                    |                    |                                                                                                                                                                                                   |                                                |
|-----------------------------------|----|-----------------------|--------------------------------------------------------------------------------------------------------------------------------------------------------------------|--------------------|---------------------------------------------------------------------------------------------------------------------------------------------------------------------------------------------------|------------------------------------------------|
|                                   |    |                       | discharge but no longer than 3 months<br>d: unknown                                                                                                                |                    | for fatigue,<br>breathlessness, appetite,<br>pain, and joint stiffness,<br>Mortality                                                                                                              |                                                |
| McWilliams<br>et al., 2016,<br>UK | 73 | Single-<br>centre RCT | a: after hospital discharge<br>b: outpatient-based exercise and<br>education program<br>c: 7 weeks<br>d: 3 times/week (1 supervised, 2 self-<br>directed titrated) | No<br>intervention | Exercise capacity,<br>HRQoL, Mortality,<br>Adverse events*                                                                                                                                        | ICU rehabilitation<br>before<br>randomisation* |
| Shelly et<br>al., 2017,<br>India  | 35 | RCT                   | a: after hospital discharge<br>b: home-based respiratory and<br>mobility training<br>c: 4 weeks<br>d: 5 times/week                                                 | No<br>intervention | HRQoL                                                                                                                                                                                             |                                                |
| McDowell<br>et al., 2017,<br>UK   | 60 | Multi-<br>centre RCT  | a: after hospital discharge<br>b: standard care plus personalized<br>exercise program<br>c: 6 weeks<br>d: 3 times/week (2 supervised and 1<br>unsupervised)        | No<br>intervention | HRQoL, Mortality,<br>Adverse events, Mobility<br>index, Hand function,<br>Exercise capacity,<br>Breathlessness, Anxiety<br>and depression<br>symptoms, Readiness to<br>exercise, Self-efficacy to |                                                |

---

exercise

---

\*Unpublished data

ICU, intensive care unit; RCT, randomised controlled trial; HRQoL, health-related quality of life; PTSD, post-traumatic stress disorder; ADL, activity of daily living
